# Supplementary material for: Optoelectronic synapse using monolayer MoS2 field effect transistors
Source: PubMed Central journal article supplement (PMC7736870; doi:10.1038/s41598-020-78767-4), 2020-12-14
Supplement: 41598_2020_78767_MOESM1_ESM.pdf [file 41598_2020_78767_MOESM1_ESM.pdf]

# Optoelectronic Synapse Using Monolayer MoS<sub>2</sub> Field Effect Transistors

*Molla Manjurul Islam,<sup>1, 2</sup> Durjoy Dev,<sup>1, 3</sup> Adithi Krishnaprasad,<sup>1, 3</sup> Laurene Tetard,<sup>1, 2</sup> and Tania Roy<sup>1, 2, 3, 4, \*</sup>*

<sup>1</sup>*NanoScience Technology Center, University of Central Florida, Orlando FL 32826, USA*

<sup>2</sup>*Department of Physics, University of Central Florida, Orlando FL 32816, USA*

<sup>3</sup>*Department of Electrical and Computer Engineering, University of Central Florida, Orlando FL 32816, USA*

<sup>4</sup>*Department of Materials Science and Engineering, University of Central Florida, Orlando FL 32816, USA*

*\*Corresponding author: [tania.roy@ucf.edu](mailto:tania.roy@ucf.edu)*

**Supporting Information**

**S1. CVD growth of large area monolayer MoS<sub>2</sub>, material characterization and mobility calculation.**

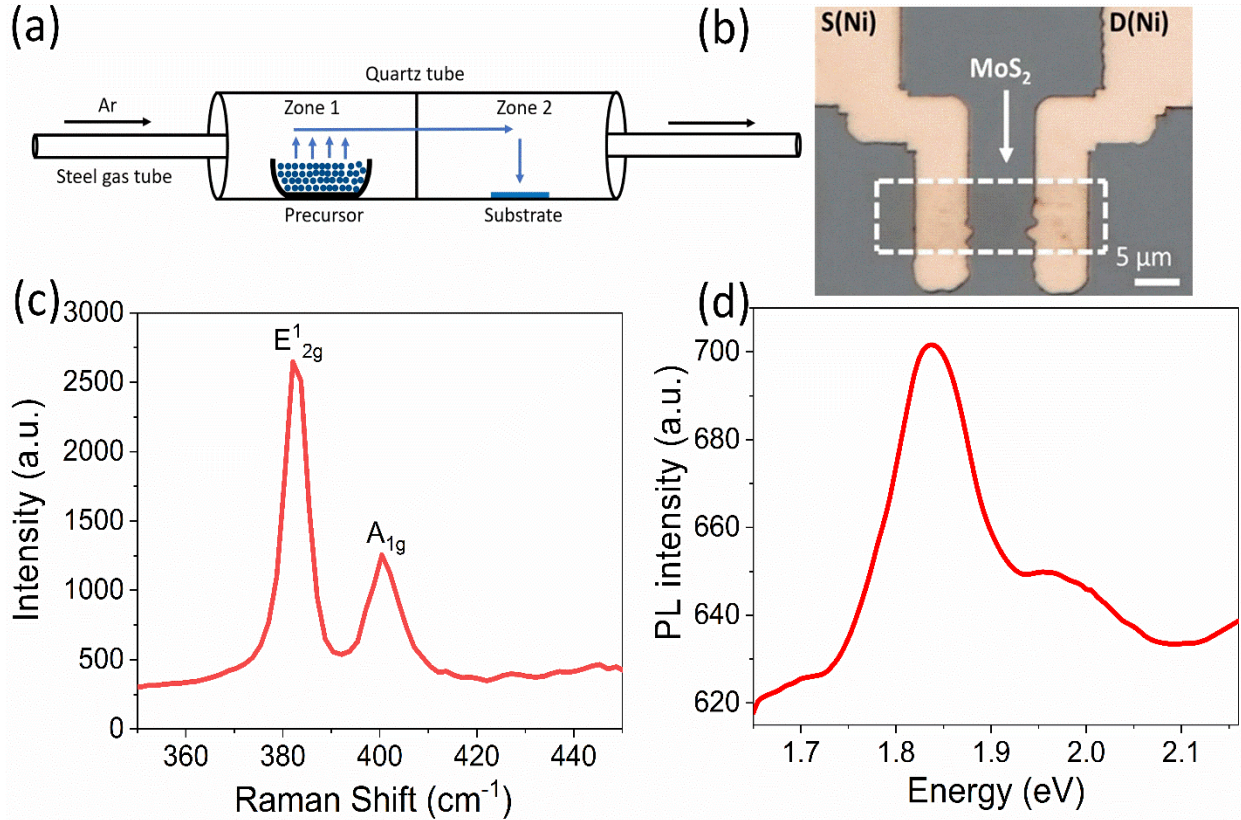

**Figure S1.** (a) Schematic (not to scale) representation of chemical vapor deposition of monolayer MoS<sub>2</sub>. (b) Optical microscopic image of back gated monolayer MoS<sub>2</sub> FET as optoelectronic synapse (c) Raman and (d) PL spectrum of CVD grown monolayer MoS<sub>2</sub>.

The typical field effect mobility of the monolayer MoS<sub>2</sub> FET in vacuum is  $1.25 \text{ cm}^2 \text{ V}^{-1} \text{ s}^{-1}$ , calculated as per the equation  $\mu_{FE} = (dI_D/dV_G) (L/W) (1/C_{ox}V_D)$ , where  $\mu_{FE}$  is the field-effect mobility,  $C_{ox}$  is the capacitance of the gate oxide,  $L$  is the length and  $W$  is the width of the conductive channel.

## S2. CVD-grown MoS<sub>2</sub> on SiO<sub>2</sub> gate.

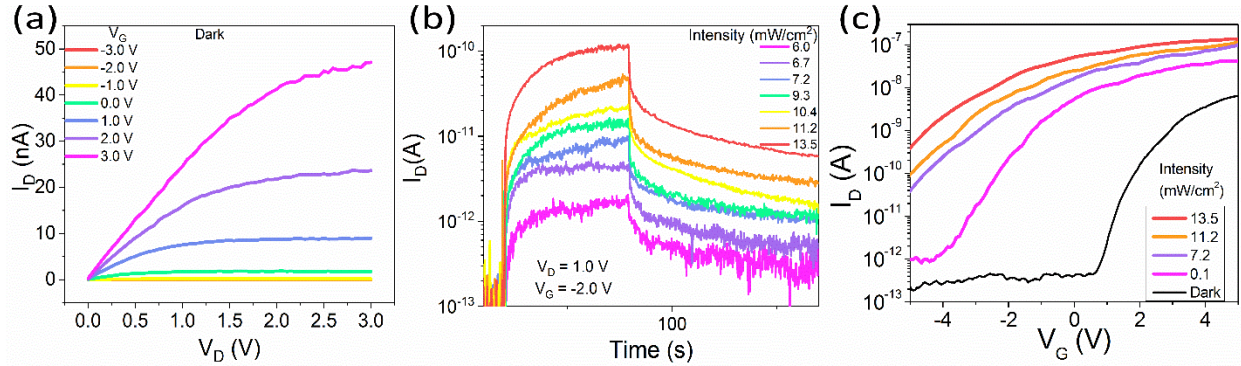

**Figure S2.** (a)  $I_D - V_D$  of CVD grown MoS<sub>2</sub> FET as Optoelectronic Synapse on SiO<sub>2</sub> gate at different  $V_G$  in dark. (b) Transient characteristics of the device showing change in the drain current after applying a single light pulse (pulse duration 30 s) with varying intensity at  $V_D = 1.0$  V and  $V_G = -2.0$  V. (c)  $I_D - V_G$  at  $V_D = 1.0$  V in dark and with different intensities of incident light.

**Figure S2a** shows  $I_D - V_D$  of CVD grown MoS<sub>2</sub> FET as Optoelectronic Synapse on SiO<sub>2</sub> gate at different  $V_G$  in dark. With increasing  $V_D$ , the drain current,  $I_D$  also increases linearly. The measurement was carried out for gate voltages starting from -3.0 V to 3.0 V. **Figure S2b** represents the transient characteristics of the device showing change in the drain current after applying a single light pulse (on time 30 s) with varying intensity at  $V_D = 1.0$  V and  $V_G = -2.0$  V. With increasing intensity, drain current,  $I_D$  also increases. It signifies the increase in photogenerated carriers. **Figure S2c** shows the  $I_D - V_G$  at  $V_D = 1.0$  V in dark and with different intensities of incident light, which confirms the photogating effect of the device.

### S3. Drain current retention of CVD grown MoS<sub>2</sub> on SiO<sub>2</sub> gate.

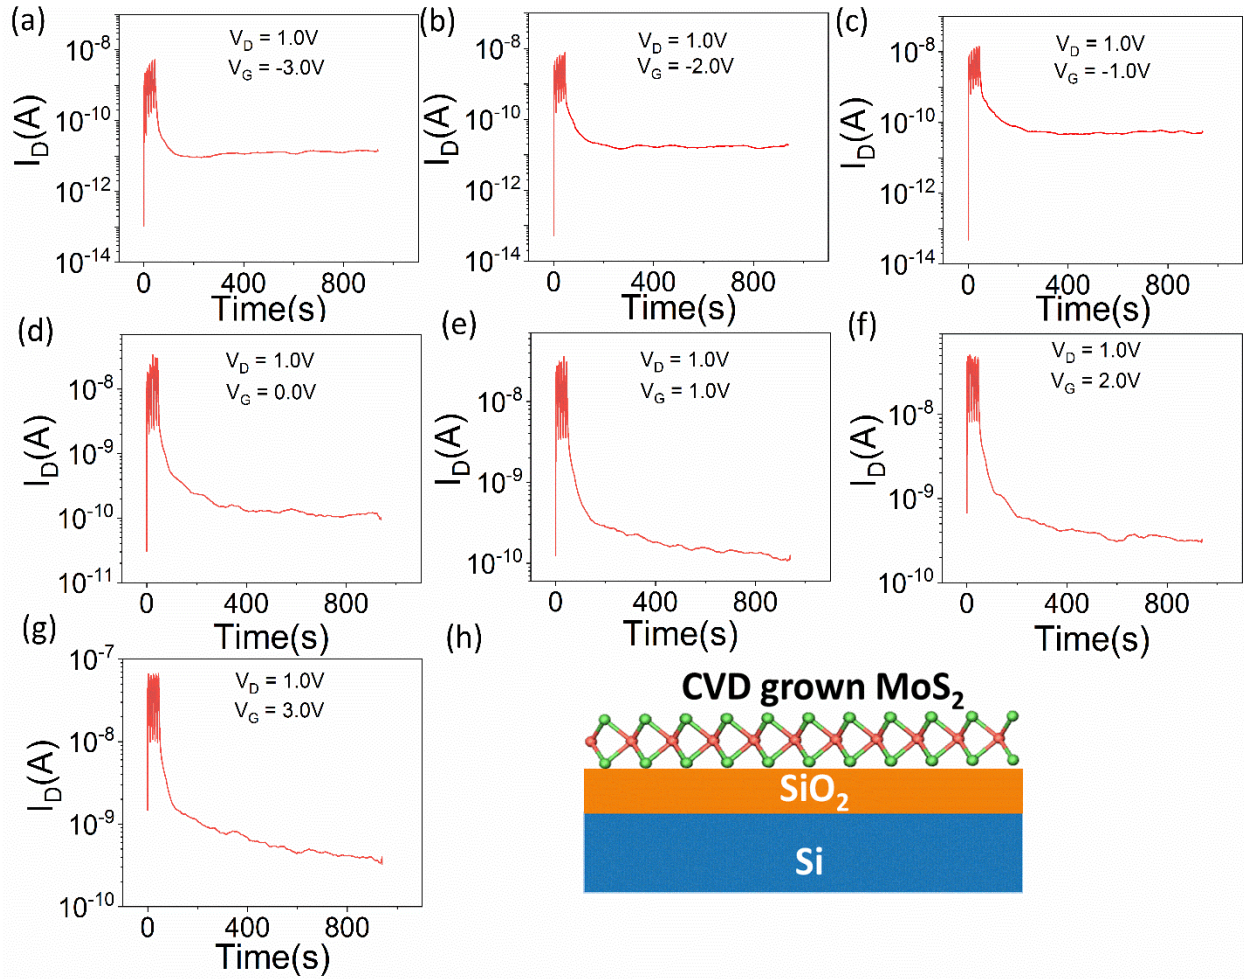

**Figure S3.** Light stimulated potentiation and drain current retention of CVD grown monolayer MoS<sub>2</sub> on SiO<sub>2</sub> gate at (a)  $V_G = -3.0$  V. (b)  $V_G = -2.0$  V. (c)  $V_G = -1.0$  V. (d)  $V_G = 0.0$  V. (e)  $V_G = 1.0$  V. (f)  $V_G = 2.0$  V. (g)  $V_G = 3.0$  V. (h) Schematic diagram of Si/SiO<sub>2</sub>/CVD grown MoS<sub>2</sub>.

**Figure S3** shows the light stimulated potentiation and drain current retention of CVD grown monolayer MoS<sub>2</sub> on SiO<sub>2</sub> gate at different gate voltages. At negative gate voltages, device potentiates with application of each light pulse and retains a huge part of drain current after removing the light source. Device shows maximum retention at  $V_G = -1.0$  V.

#### S4. Drain current retention of CVD grown MoS<sub>2</sub> on Al<sub>2</sub>O<sub>3</sub> gate.

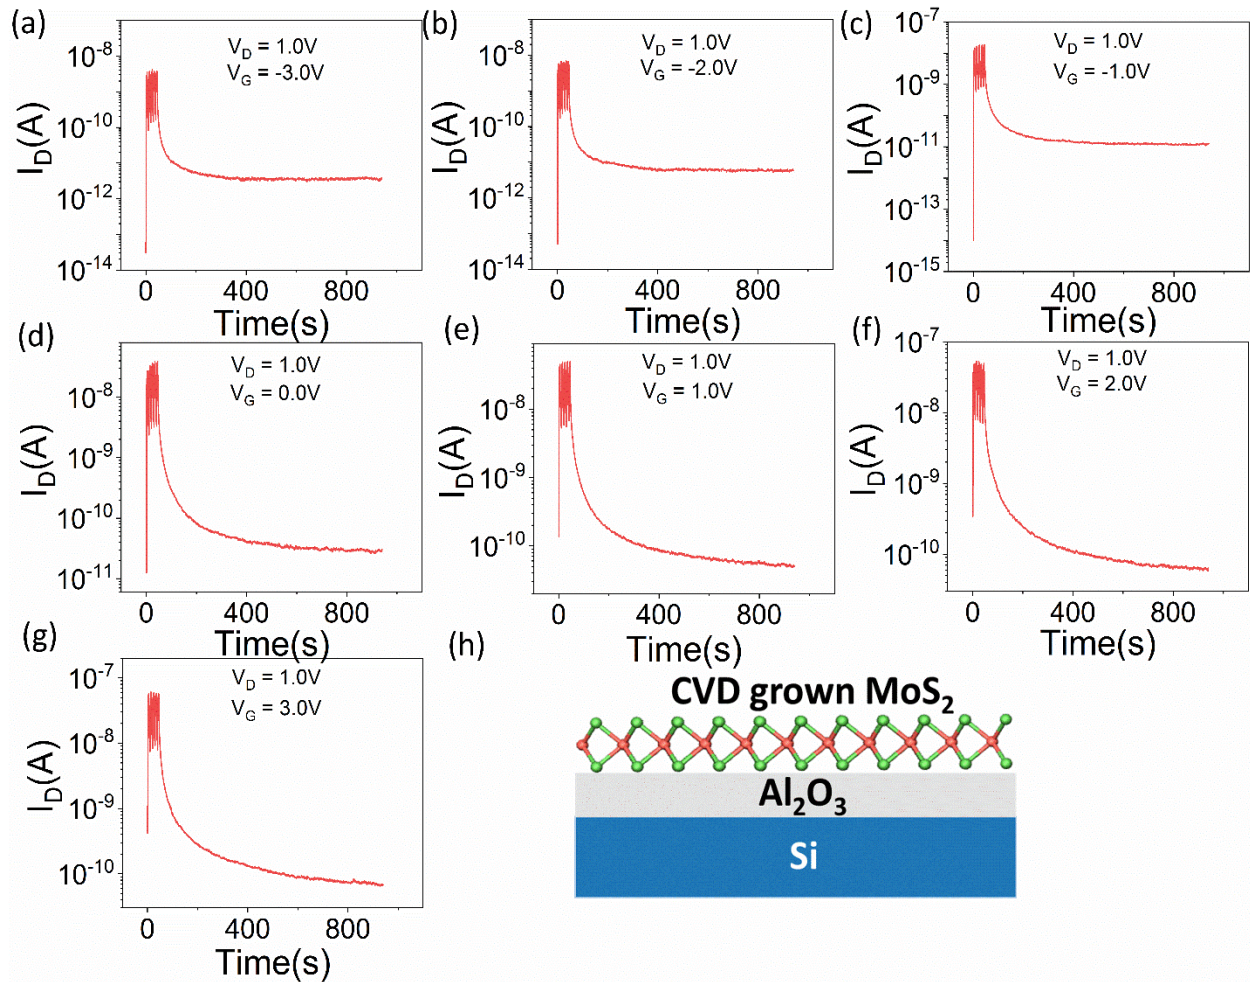

**Figure S4.** Light stimulated potentiation and drain current retention of CVD grown monolayer MoS<sub>2</sub> on Al<sub>2</sub>O<sub>3</sub> gate at (a)  $V_G = -3.0$  V. (b)  $V_G = -2.0$  V. (c)  $V_G = -1.0$  V. (d)  $V_G = 0.0$  V. (e)  $V_G = 1.0$  V. (f)  $V_G = 2.0$  V. (g)  $V_G = 3.0$  V. (h) Schematic diagram of Si/Al<sub>2</sub>O<sub>3</sub>/CVD grown MoS<sub>2</sub>.

**Figure S4** shows the light stimulated potentiation and drain current retention of CVD grown monolayer MoS<sub>2</sub> on Al<sub>2</sub>O<sub>3</sub> gate at different gate voltages. At negative gate voltages, device potentiates with application of each light pulse and retains a huge part of drain current after removing the light source. Device shows maximum retention at  $V_G = -1.0$  V. Therefore, device characteristics does not change for replacing SiO<sub>2</sub> gate with Al<sub>2</sub>O<sub>3</sub> gate dielectric.

### S5. Drain current retention of exfoliated MoS<sub>2</sub> on SiO<sub>2</sub> gate.

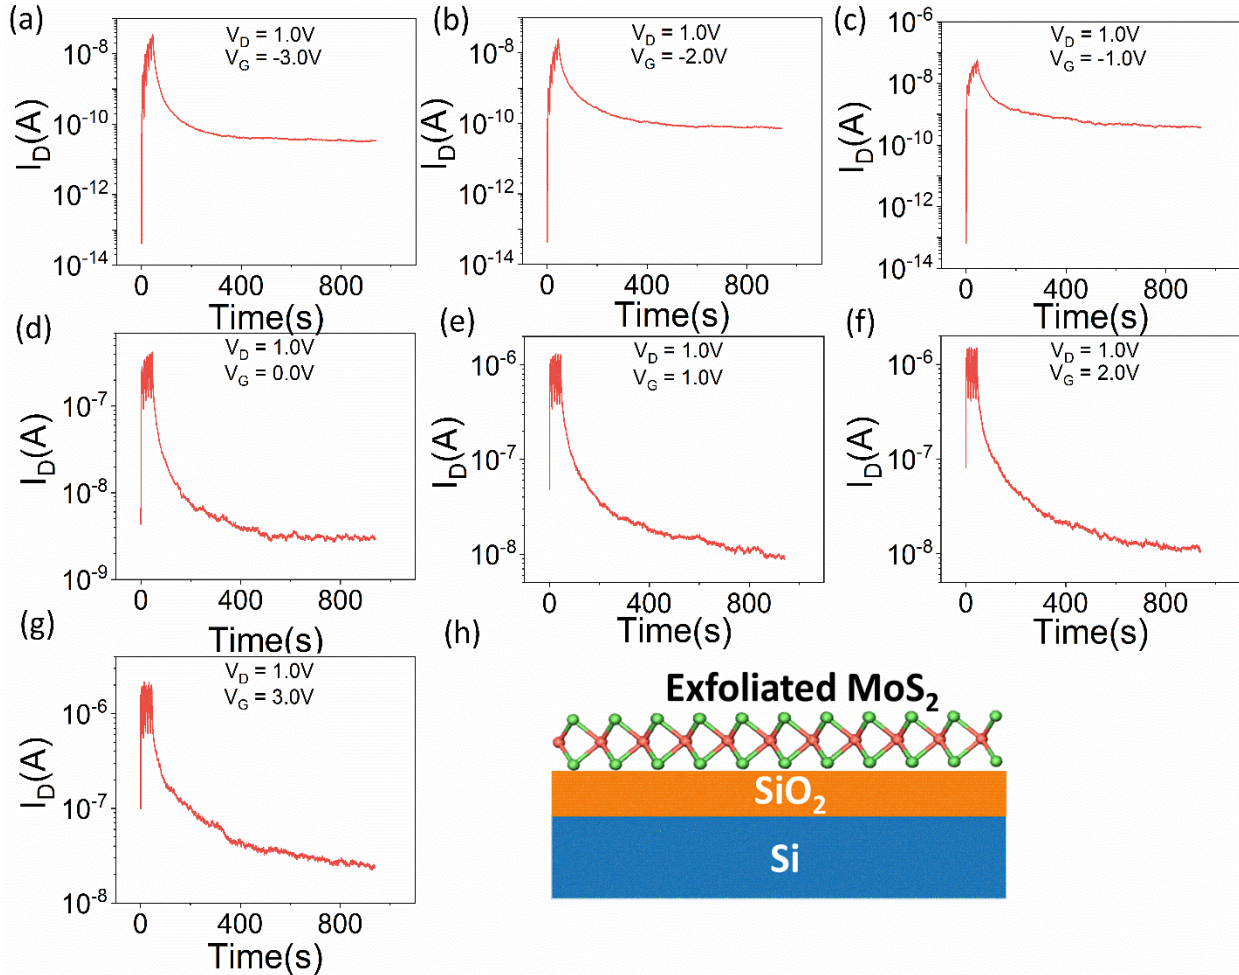

**Figure S5.** Light stimulated potentiation and drain current retention of exfoliated MoS<sub>2</sub> on SiO<sub>2</sub> gate at (a)  $V_G = -3.0$  V. (b)  $V_G = -2.0$  V. (c)  $V_G = -1.0$  V. (d)  $V_G = 0.0$  V. (e)  $V_G = 1.0$  V. (f)  $V_G = 2.0$  V. (g)  $V_G = 3.0$  V. (h) Schematic diagram of Si/SiO<sub>2</sub>/Exfoliated MoS<sub>2</sub>.

**Figure S5** shows the light stimulated potentiation and drain current retention of exfoliated MoS<sub>2</sub> on SiO<sub>2</sub> gate at different gate voltages. At negative gate voltages, device potentiates with application of each light pulse and retains a huge part of drain current after removing the light source. Device shows maximum retention at  $V_G = -1.0$  V. Therefore, device characteristics does not change for replacing the CVD grown MoS<sub>2</sub> with exfoliated MoS<sub>2</sub>.

**S6.  $I_D - V_G$ ,  $I_D - V_D$  and drain current retention of exfoliated WSe<sub>2</sub> on SiO<sub>2</sub> gate**

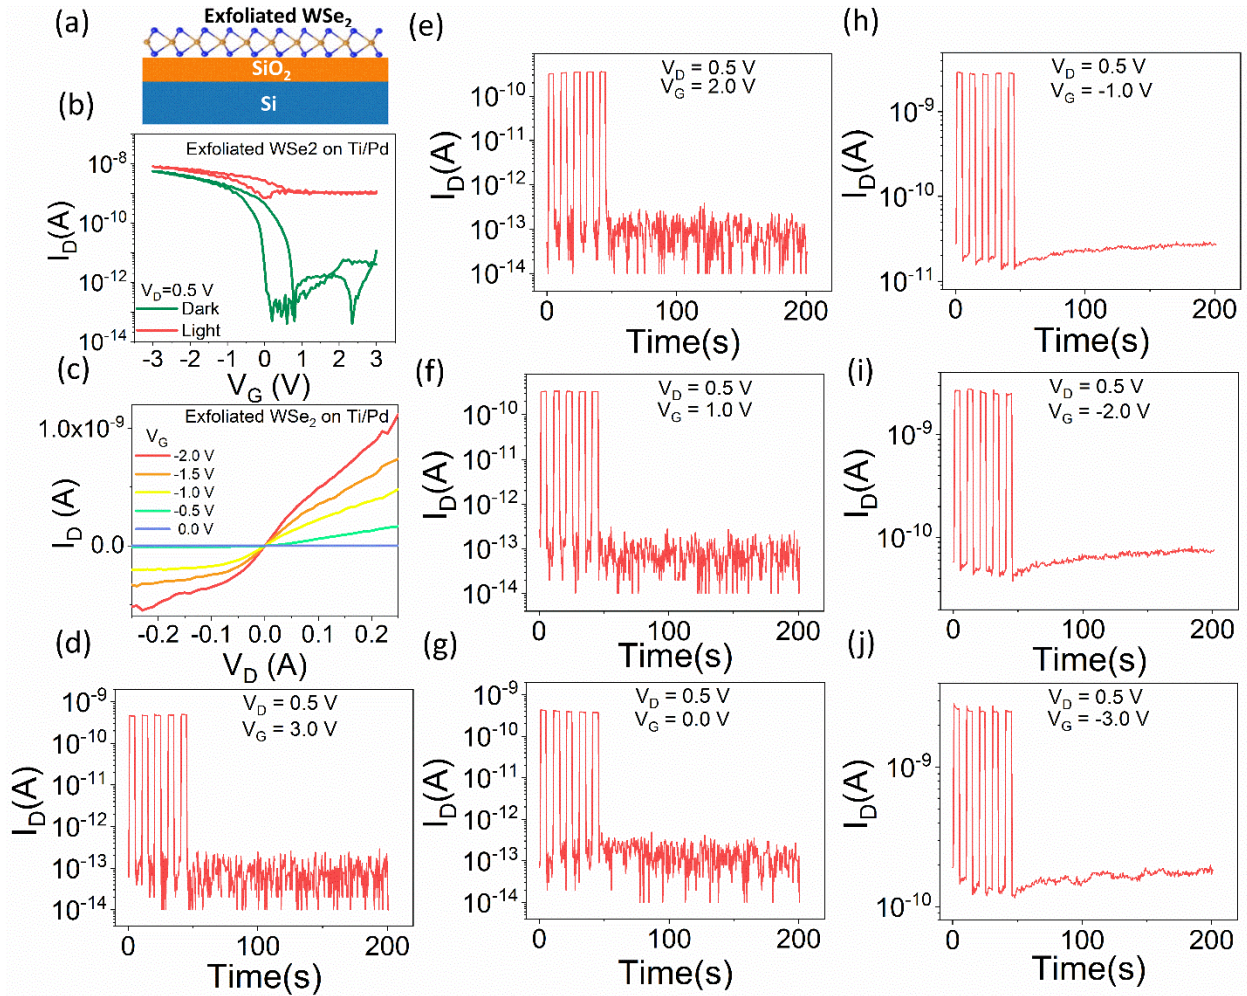

**Figure S6.** Exfoliated WSe<sub>2</sub> FET on SiO<sub>2</sub> gate: (a) Schematic diagram (b)  $I_D - V_G$  at  $V_D = 0.5$  V in dark and under light illumination, (c)  $I_D - V_D$  at different  $V_G$  in dark. Light stimulated potentiation and zero drain current retention of exfoliated WSe<sub>2</sub> on SiO<sub>2</sub> gate at (d)  $V_G = 3.0$  V. (e)  $V_G = 2.0$  V. (f)  $V_G = 1.0$  V. (g)  $V_G = 0.0$  V. (h)  $V_G = -1.0$  V. (i)  $V_G = -2.0$  V. (j)  $V_G = -3.0$  V.

**Figure S6** shows the exfoliated WSe<sub>2</sub> FET on SiO<sub>2</sub> gate (a) Schematic diagram (b)  $I_D - V_G$  at  $V_D = 0.5$  V in dark and under light illumination, (c)  $I_D - V_D$  at different  $V_G$  in dark. Light stimulated potentiation and drain current retention of exfoliated WSe<sub>2</sub> on SiO<sub>2</sub> gate at different gate voltages. Device did not show any retention of drain current for any of the applied gate voltages.

Therefore, WSe<sub>2</sub>/MoS<sub>2</sub> interface is not capable of trapping the photogenerated holes. So, the photogenerated carriers recombine as soon as the light source is removed.

### S7. Paired pulse facilitation measurement.

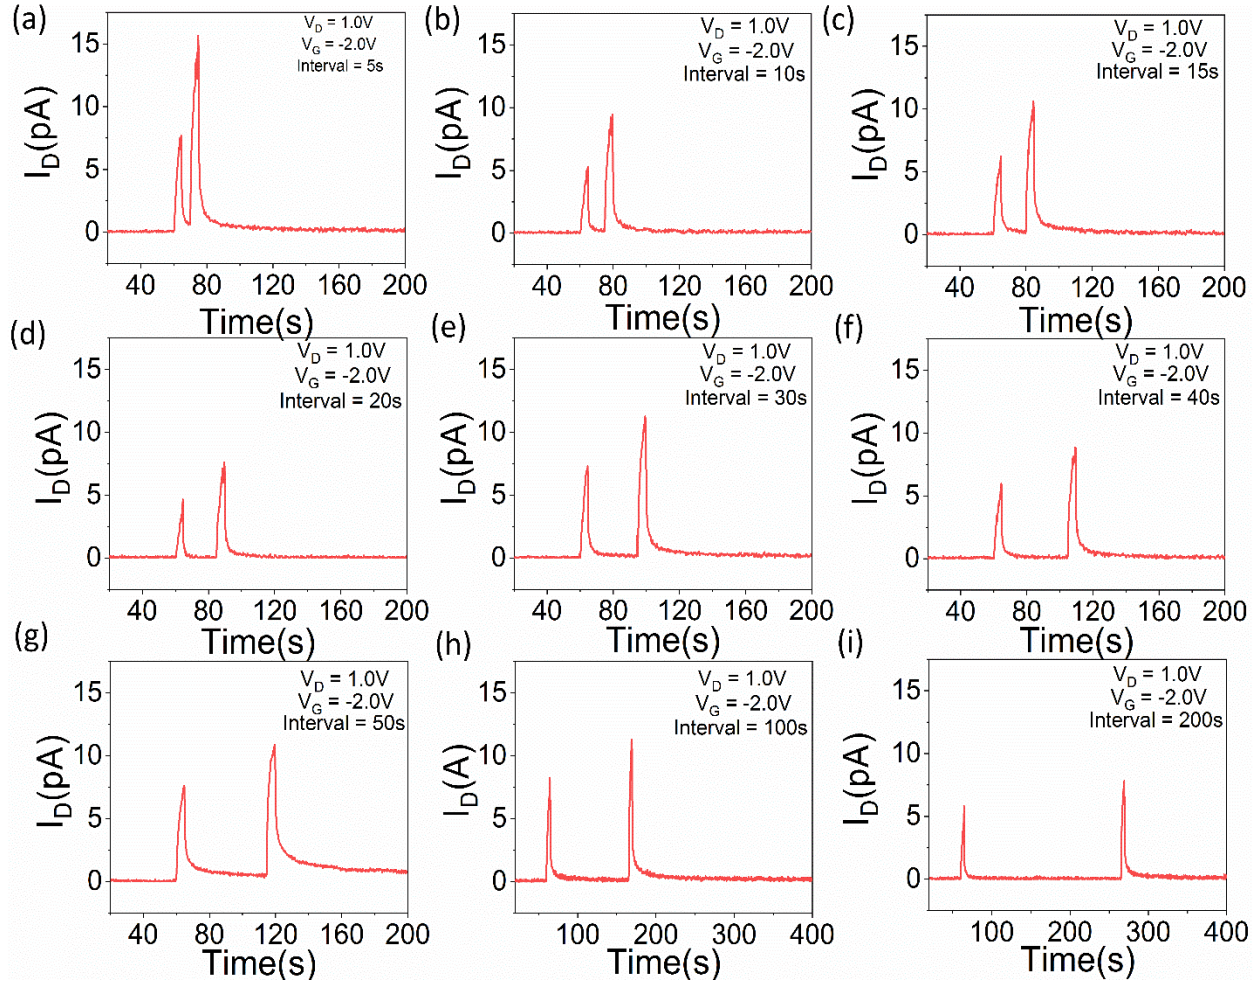

**Figure S7.** Paired pulse facilitation measurement at  $V_D = 1.0$  V and  $V_G = -2.0$  V for the time interval (a) 5 s, (b) 10 s, (c) 15 s, (d) 20 s, (e) 30 s, (f) 40 s, (g) 50 s, (h) 100 s, (i) 200 s between two successive light pulses.

**Figure S7** shows the paired pulse facilitation measurement at  $V_D = 1.0$  V and  $V_G = -2.0$  V for different time intervals. Two successive light pulses were applied to the device. With increasing



time difference between the two applied pulses, the drain current amplitude after second pulse decreased gradually. Maximum drain current after second light pulse was recorded for minimum time interval between the two applied pulses.

### S8. Spike time dependent plasticity measurement.

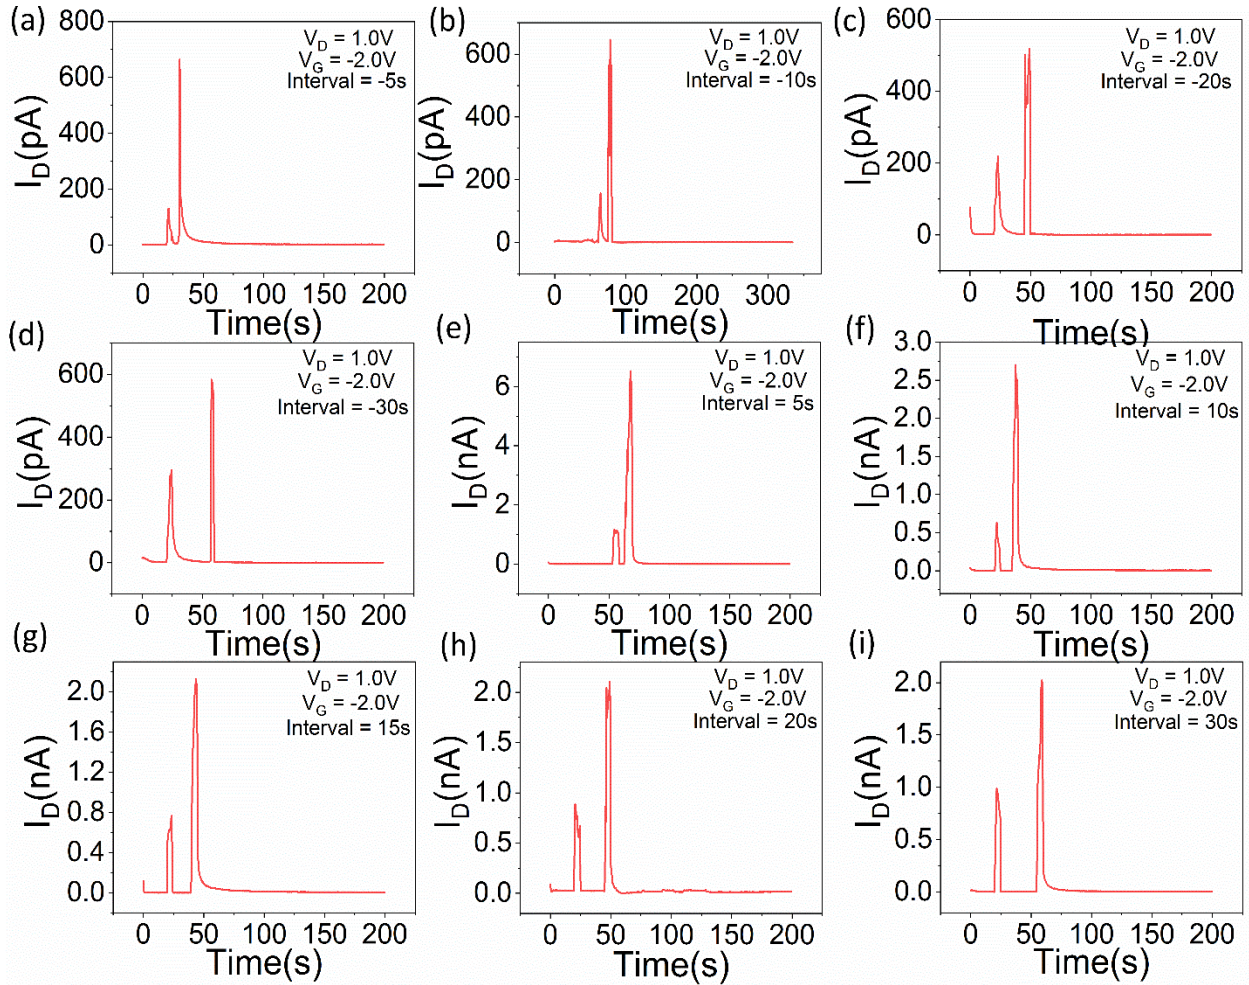

**Figure S8.** Spike time dependent plasticity measurement at  $V_D = 1.0$  V and  $V_G = -2.0$  V for the time interval (a) -5 s, (b) -10 s, (c) -20 s, (d) -30 s, (e) 5 s, (f) 10 s, (g) 15 s, (h) 20 s, (i) 30 s between two successive light pulses.

**Figure S8** shows the spike time dependent plasticity measurement for different time intervals between two applied light pulses. Two light pulses were applied to two electrically shorted devices separately with a varied time interval at  $V_G = -2.0$  V and  $V_D = 1.0$  V. With increasing time interval between two applied light pulses, the drain current amplitude after second pulse decreased gradually. When first light pulse was applied on presynaptic device, the time interval was considered positive and when first light pulse was applied on postsynaptic device, the time interval was considered negative.
